# Supplementary material for: CCDC120 Phase Separation Contributes to Desmosomal Integrity and Cardiac Function
Source: Research Square preprint supplement (doi:10.21203/rs.3.rs-6141491/v1), 2025-04-17
Supplement: Supplementary file 1 [file fc7d506e7413d75aa5d1a6bc.docx]

**Supplementary Information**

**CCDC120 Phase Separation Contributes to Desmosomal Integrity and Cardiac Function**

Hui Meng, Wei Zhao, Yangyingzi Xi, Donghui Zhang, Xipan Han, Rixu Cong, Tianning Wang, Yingchun Hu, Yonglu Tian, Junlin Teng, Jianguo Chen, Ning Huang

**
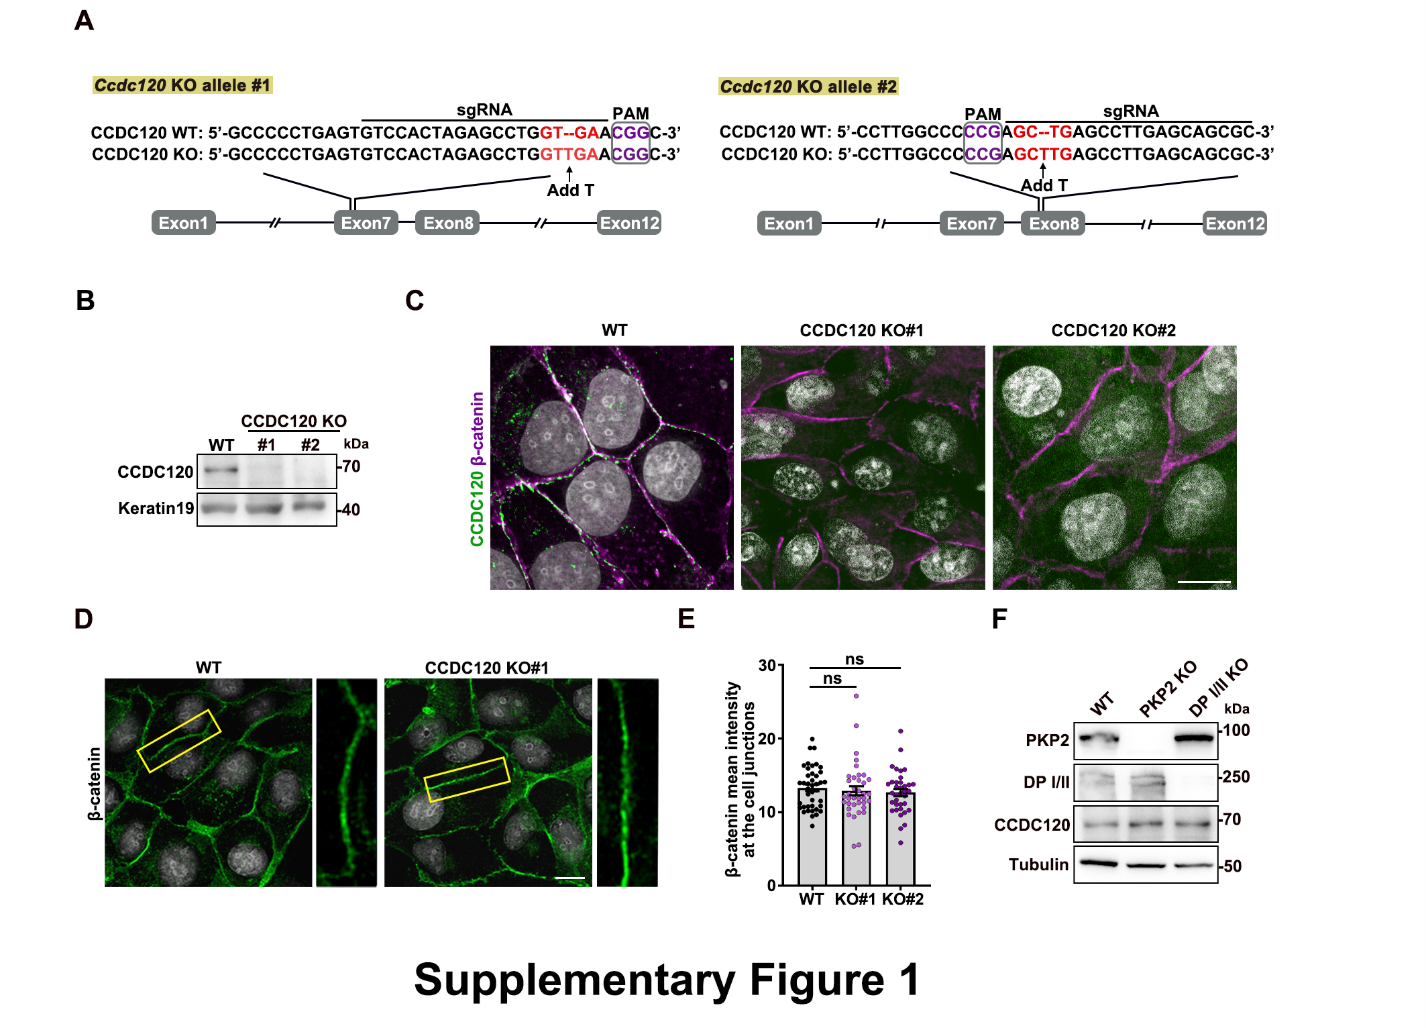
**

**Supplementary Figure 1. CCDC120 is required for desmosomal component assembly.** **(A)** Schematic representation of the genome sequence in wild-type (WT) and two different CCDC120 knock-out (KO) MDCK cells generated by CRISPR/Cas9. The sgRNA-targeting sequence is underlined, and the PAM sequence is labeled in magenta. The red characters and black arrows indicate gene editing sites. **(B)** Immunoblotting showing the total protein levels of CCDC120 in WT and CCDC120 KO MDCK cells. Keratin19 was used as the loading control. **(C)** Immunofluorescence of CCDC120 (green) and β-catenin (magenta) in WT and CCDC120 KO MDCK cells. Scale bars, 10 μm. **(D)** Immunostaining staining of β-catenin (green) in WT and CCDC120 KO MDCK cells. DNA was stained with DAPI (gray). Magnified views of the cell-cell boundary are shown on the right. Scale bars, 10 μm. **(E)** Quantification of the mean intensity ofβ-catenin signaling at cell borders from **(D)**. More than 60 cell-cell borders from three independent experiments were analyzed. **(F)** Immunoblotting showing total protein levels of CCDC120, DP I/II, and PKP2 in WT, DP I/II, and PKP2 KO MDCK cells. Tubulin was used as a loading control.Data are presented as mean ± SEM. Statistical significance was assessed using one-way ANOVA with Dunnett’s multiple comparisons test. n.s., not significant.


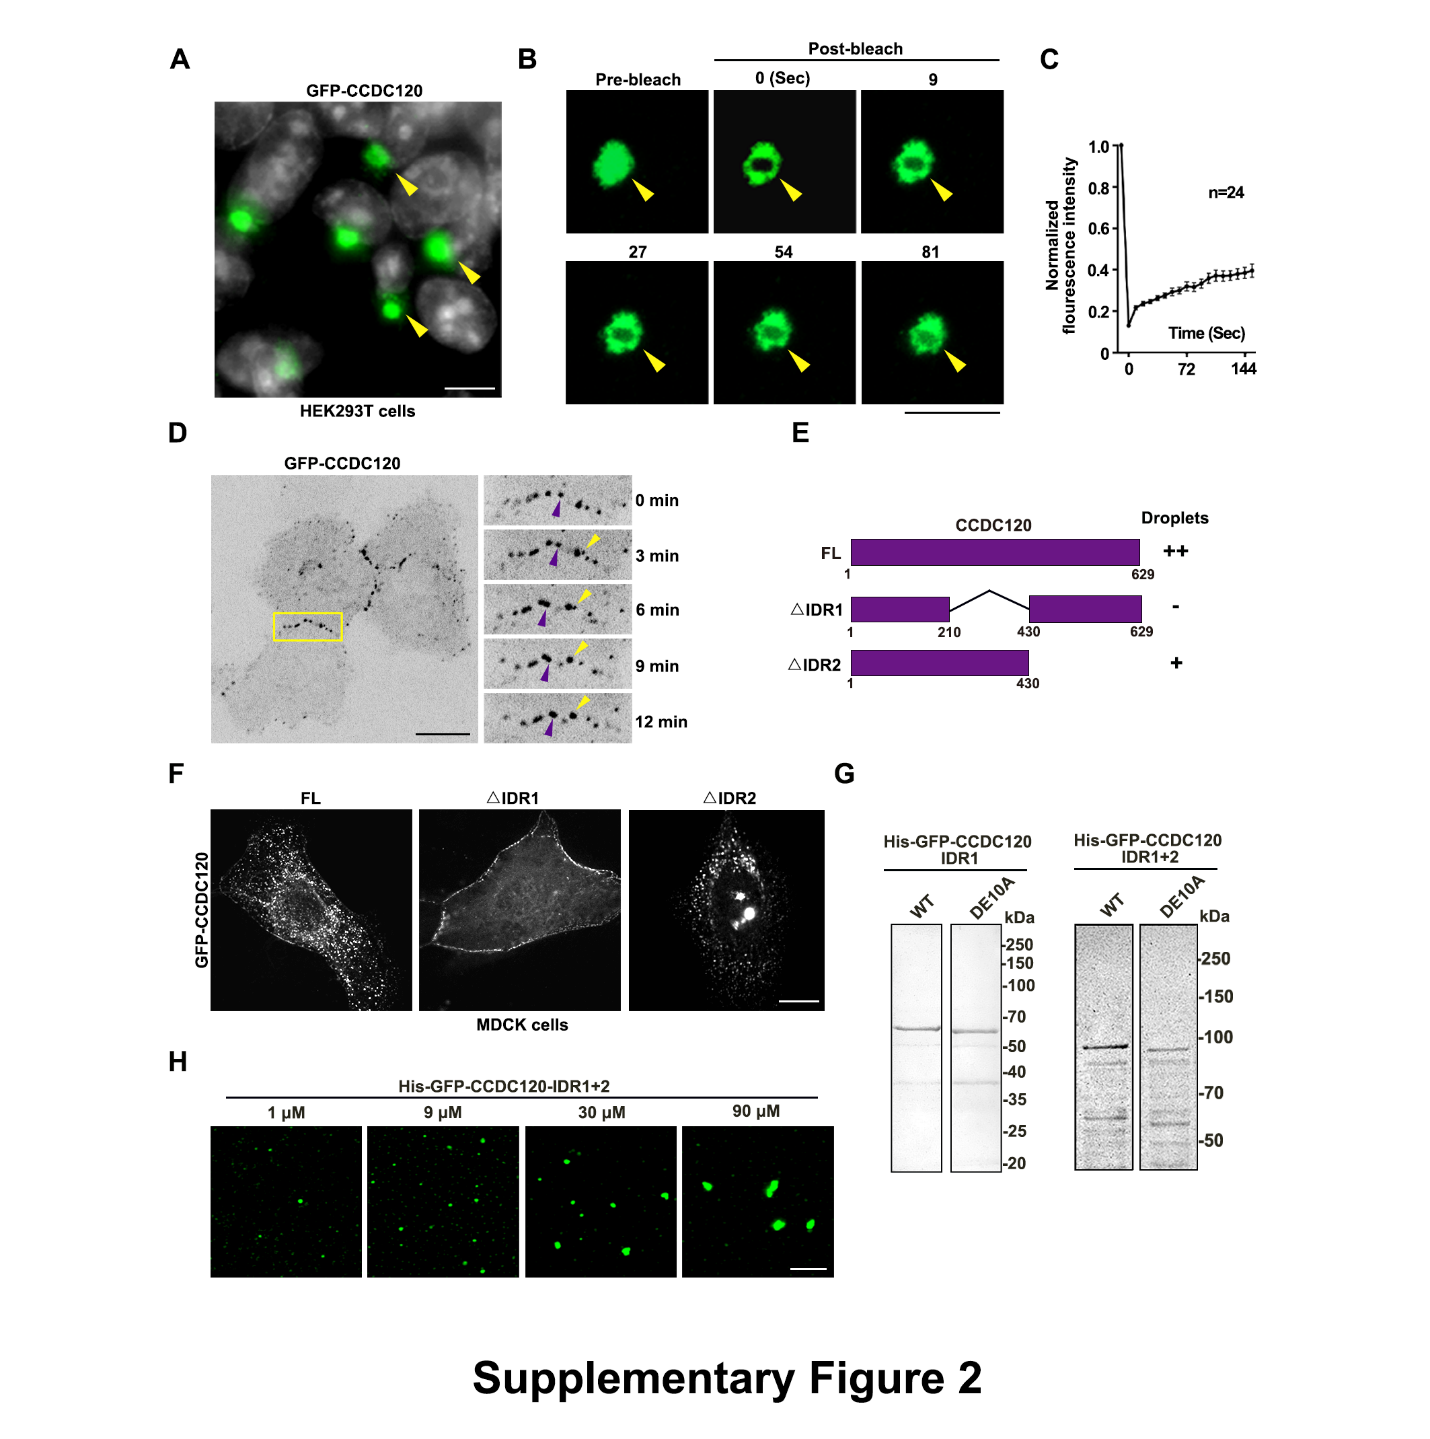


**Supplementary Figure 2.** **CCDC120 undergoes phase separation.** **(A)** Arepresentative image showing GFP-CCDC120 forming unique, large-size condensates (arrowheads) in the cytoplasm of HEK293T cells. Scale bar, 10 μm. **(B, C)** Time-lapse images **(B)** and quantification **(C)** of FRAP analysis of GFP-CCDC120 condensates (arrowheads) before and after photobleaching in the cytoplasm of HEK293T cells (*n* = 24 cells). Scale bar, 10 μm. Data are presented as mean ± SEM. **(D)** Live-cell imaging showing the dynamics of GFP-CCDC120 particles at cell junctions in HeLa cells. A magnified view of the cell-cell boundary is shown on the right. Fusion events are highlighted by arrowheads in different colors. Scale bar, 10 μm. **(E)** Schematic representation showing CCDC120 FL and its truncation mutants. **(F)** Expression of GFP-CCDC120 FL or its truncation mutants in MDCK cells. Scale bar, 10 μm. **(G)** Coomassie brilliant blue (CBB) showing different purified His-GFP-CCDC120 mutation proteins from *E. coli*. **(H)** Concentration-dependent phase separation assay of CCDC120-IDR1+2 *in vitro*. Scale bar, 5 μm.


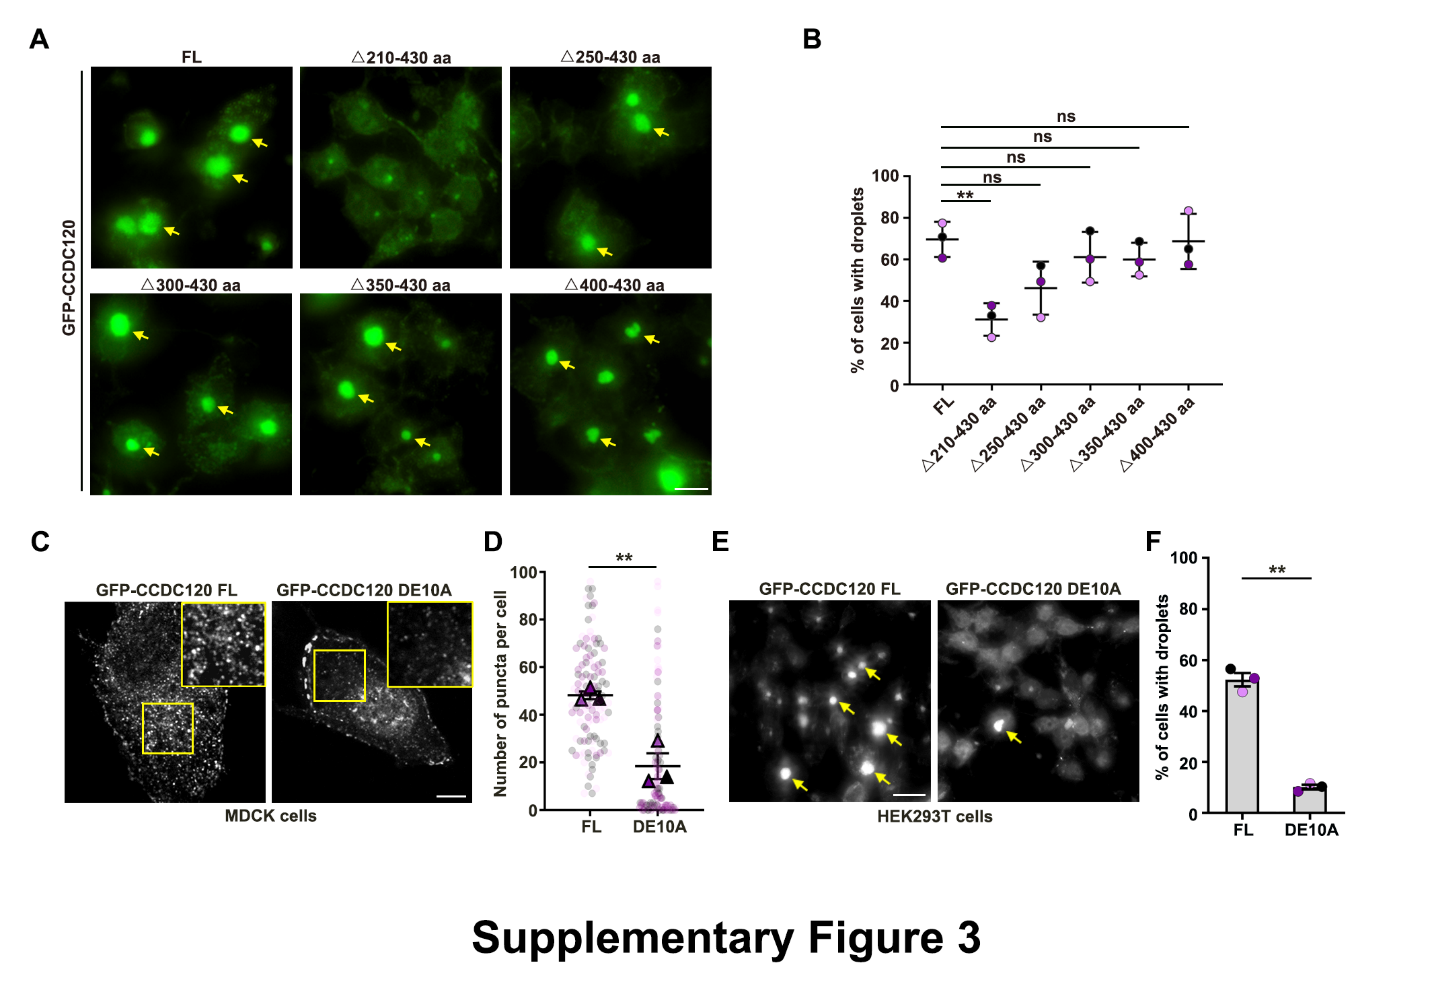


**Supplementary Figure 3. CCDC120 phase separation is mediated by IDR. (A, B)** Representative images **(A)** and quantification **(B)** of HEK293T cells expressing GFP-CCDC120 FL or its truncated mutants. Arrows indicate condensates formed by GFP-CCDC120. Scale bar, 10 μm. More than 400 cells were analyzed from three independent experiments.**(C)** Expression of GFP-CCDC120 FL or DE10A mutant in MDCK cells. Magnified views highlight condensates in the cytoplasm. Scale bar, 5 μm. **(D)** Quantification of droplet numbers in GFP-CCDC120 FL- or DE10A-overexpressed MDCK cells. More than 100 cells were analyzed from three independent experiments. **(E, F)** Confocal images **(E)** and quantifications **(F)** of HEK293T cells expressing GFP-CCDC120 FL or DE10A mutants. Arrows indicate condensates formed by GFP-CCDC120. Scale bar, 5 μm. More than 100 cells were analyzed from three independent experiments. Data are mean ± SEM. Statistical significance was assessed using a paired two-sided Student’s *t*-test or repeated measures one-way ANOVA. ***P* < 0.01; ****P* < 0.001. n.s., not significant.


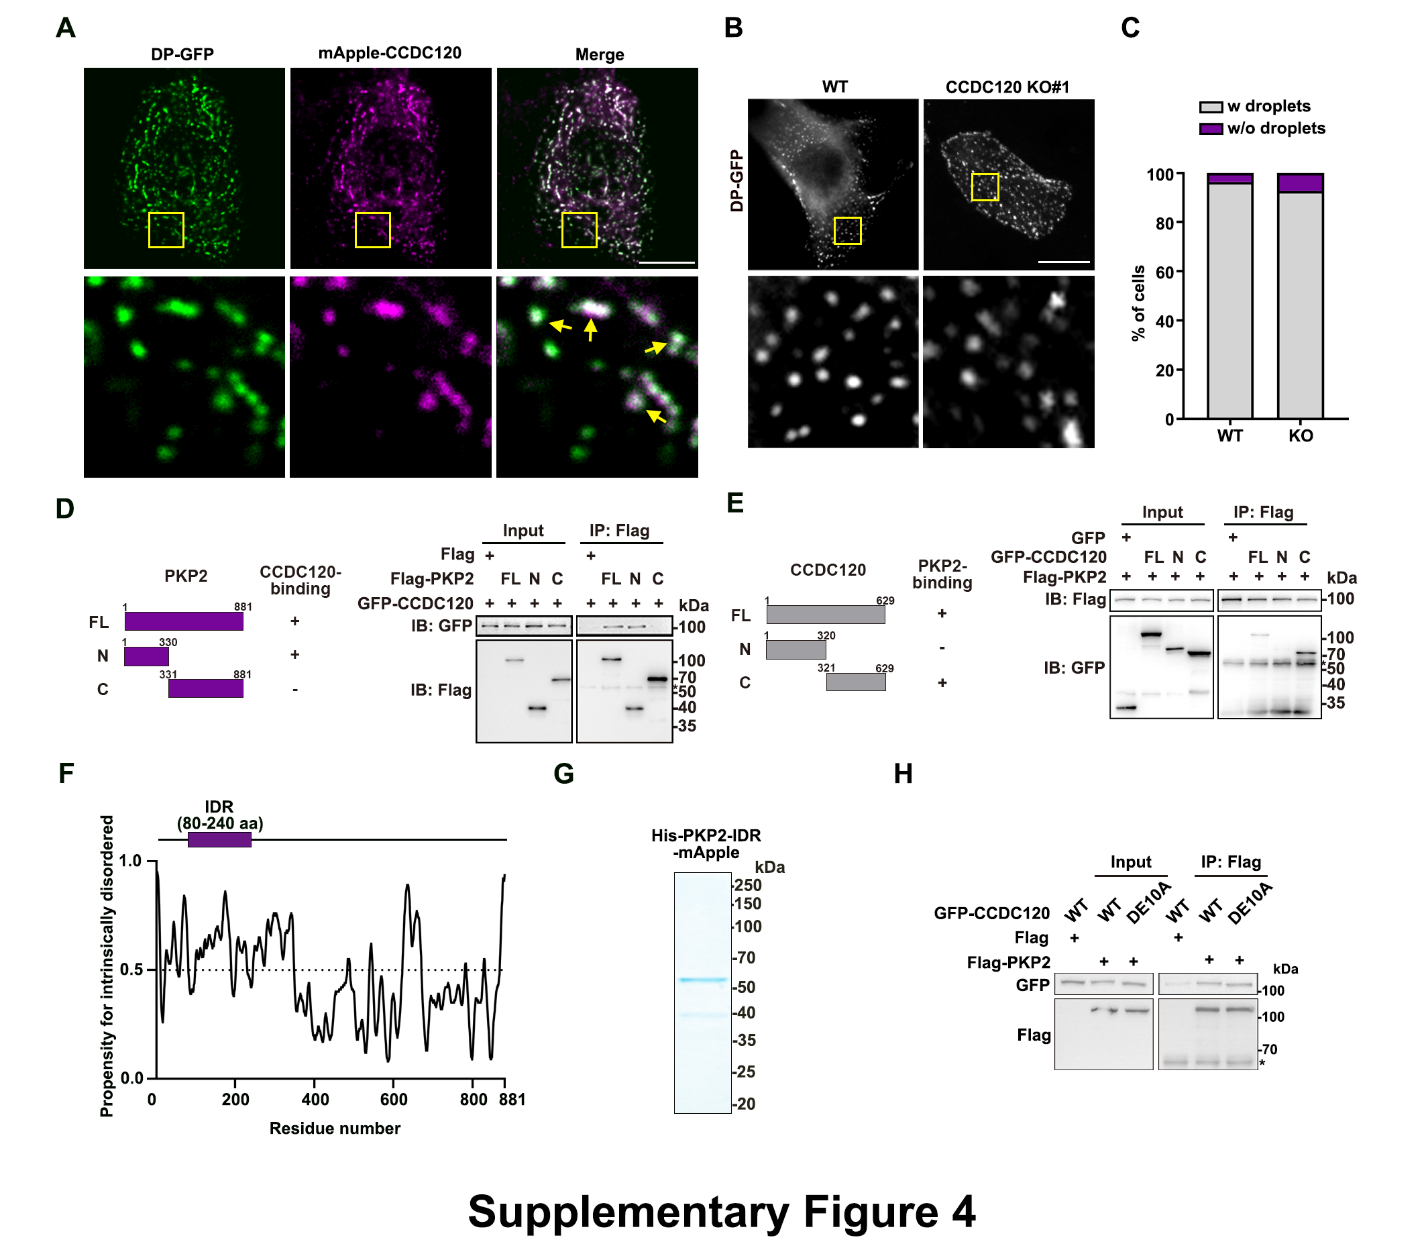


**Supplementary Figure 4. DP forms lipid droplets in a CCDC120-independent manner. (A)** Confocal images of HeLa cells expressing DP-GFP (green) and mApple-CCDC120 (magenta). A magnified view shows condensates in the cytoplasm (bottom). Arrows indicate colocalized condensates in the cytoplasm. Scale bar, 10 μm. **(B)** Representative images of DP-GFP in WT or CCDC120 KO MDCK cells (top). A magnified view shows condensates in the cytoplasm (bottom). Scale bar, 10 μm. **(C)** Quantification of the percentage of cells with (gray) or without droplets (magenta) in **(B)**. More than 60 cells in different groups were analyzed from three independent experiments. **(D)** Schematic representation of PKP2 full-length (FL) and two truncates (N, C). CCDC120-binding ability: +, positive; -, negative (top). Lysates of HEK293T cells co-overexpressing GFP-CCDC120 and Flag-PKP2 FL or indicated truncates were subjected to immunoprecipitation (IP) and immunoblotted (IB) with anti-Flag and anti-GFP antibodies. The asterisk marks the IgG heavy chain. **(E)** Schematic representation of CCDC120 FL and truncates (N, C). PKP2-binding ability: +, positive; -, negative (top). Lysates of HEK293T cells co-overexpressing Flag-PKP2 and GFP-CCDC120 FL or truncates were subjected to immunoprecipitation (IP) and immunoblotted (IB) with anti-Flag and anti-GFP antibodies. The asterisk marks the IgG heavy chain. **(F)** Schematic diagram of the predicted intrinsically disordered regions (IDRs) of PKP2 based on PrDOS (https://prdos.hgc.jp). A score greater than 0.5 is considered to be intrinsically disordered. **(G)** CBB staining of purified His-PKP2-IDR-mApple. **(H)** Lysates of HEK293T cells co-overexpressing Flag-PKP2 and GFP-CCDC120 WT or DE10A mutant were subjected to IP and IB with anti-Flag and anti-GFP antibodies. The asterisk marks the IgG heavy chain.

**
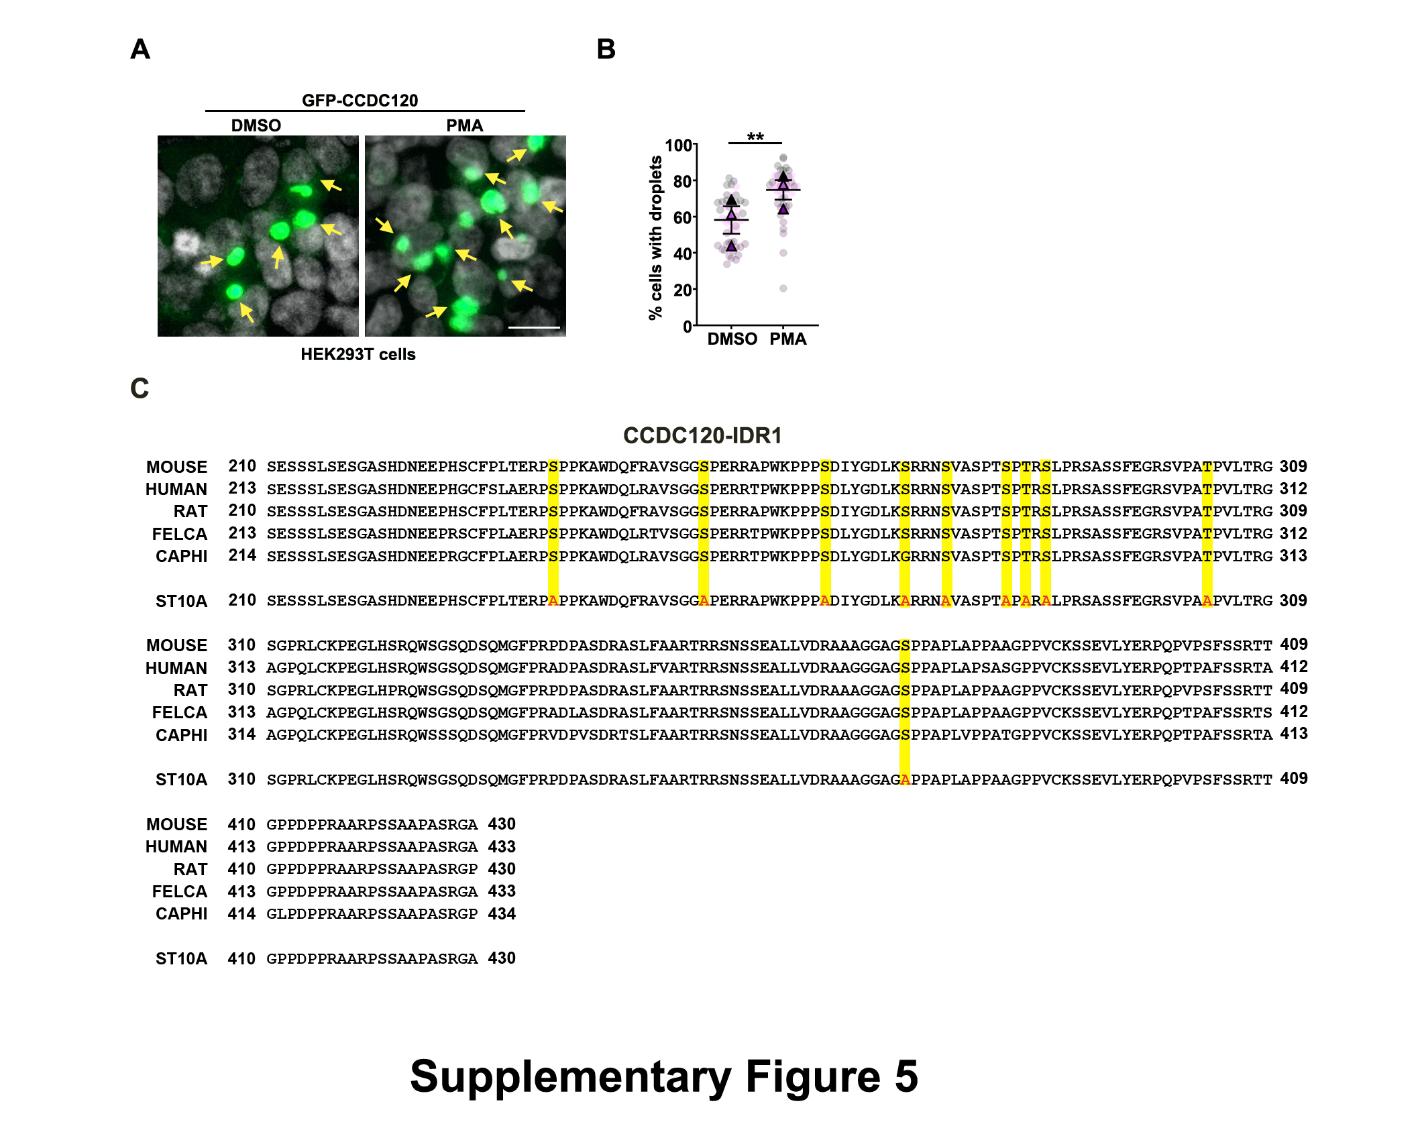
Supplementary Figure 5. PKC promotes phase separation of CCDC120.** **(A, B)** Representative images **(A)** and quantification **(B)** of HEK293T cells expressing GFP-CCDC120 and treated with either DMSO or 15 nM PMA for 30 min. Arrows indicate condensates formed by GFP-CCDC120. DNA was stained with DAPI (gray). Scale bar, 20 μm. More than 100 cells were analyzed from three independent experiments. **(C)** Multiple sequence alignment of CCDC120-IDR1. Phosphorylation sites are highlighted (top). Mutagenesis of these serine or threonine residues to alanine residues (ST10A) is listed at the bottom. Data are mean ± SEM. Statistical significance was assessed using a paired two-sided Student’s *t*-test. ***P* < 0.01.


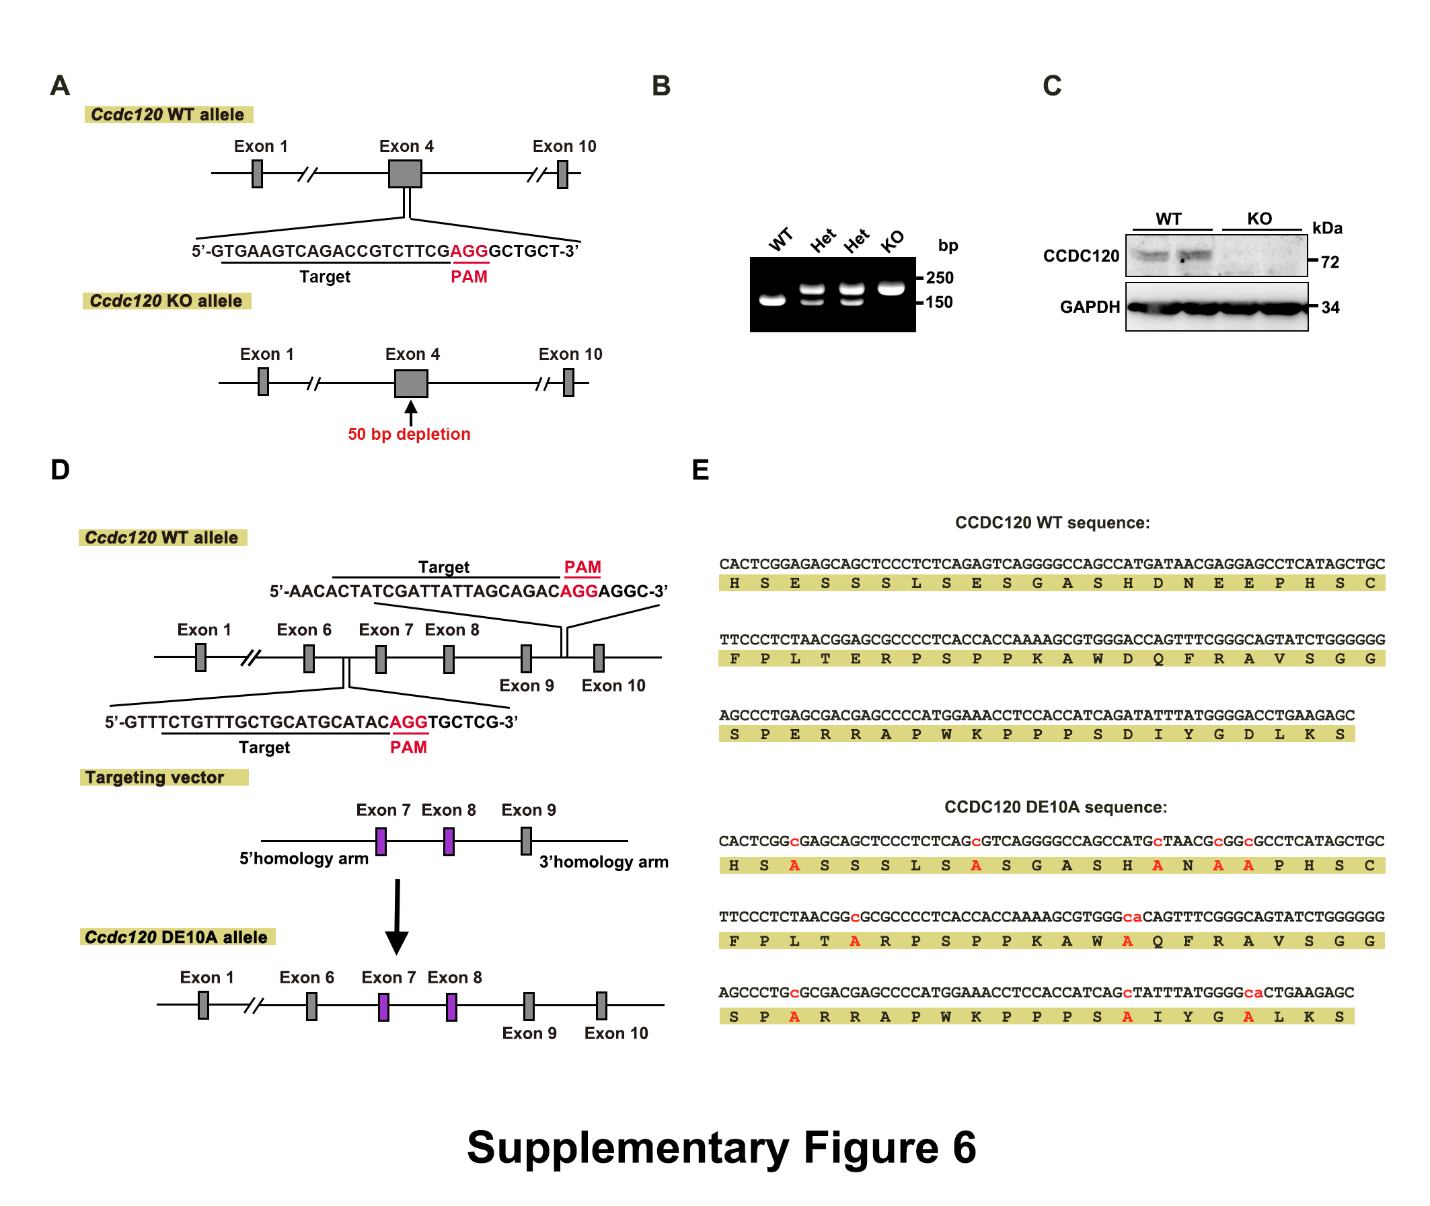


**Supplementary Figure 6. Generation of *Ccdc120* KO and DE10A mice.** **(A)** Schematic representation of the *Ccdc120* deletion mutant in mice generated using CRISPR/Cas9. The sgRNA-targeting sequence is underlined, and the PAM site is labeled in red. A 50 bp depletion in exon 4 causes *Ccdc120* depletion. **(B)** PCR assays to detect *Ccdc120* deletion mutant mice. WT, wild type; Het, heterozygote; KO, knockout. **(C)** Immunoblotting validates the protein levels of CCDC120 in brain tissue from 2-month-old WT and *Ccdc120* KO mice. GAPDH was used as a loading control. **(D)** Schematic representation of the *Ccdc120* knock-in mutant (DE10A) using CRISPR/Cas9. The sgRNA-targeting sequence is underlined, and the PAM site is labeled in red. Mutant exons are highlighted in magenta. The *Ccdc120* DE10A allele after homologous recombination is shown at the bottom. **(E)** Sequence alignment between CCDC120 WT and DE10A mice. The altered nucleotides and amino acids are highlighted in red.

**Supplementary Table 1. Echocardiographic parameter in WT, *Ccdc120* KO and *Ccdc120* DE10A mutant mice**

|  | **WT n=10** | ***ccdc120* KO n=13** | ***ccdc120* DE10A n=8** | |
| --- | --- | --- | --- | --- |
| *LVEF (%)* | 62.03 ± 2.57 | 46.48 ± 2.24 | 46.55 ± 3.80 | |
| *FS (%)* | 32.87 ± 1.87 | 22.79 ± 1.30 | 22.90 ± 2.11 | |
| *LVEDV (mm3)* | 49.20 ± 2.07 | 52.46 ± 4.19 | 49.68 ± 2.90 | |
| *LVESV (mm3)* | 18.50 ± 1.21 | 28.55 ± 2.99 | 26.88 ± 2.91 | |
| *LVAW; d (mm)* | 0.99 ± 0.06 | 1.02 ± 0.09 | 0.92 ± 0.04 | |
| *LVAW; s (mm)* | 1.37 ± 0.06 | 1.29 ± 0.09 | 1.14 ± 0.03 | |
| *LVID; d (mm)* | 3.48 ± 0.06 | 3.48 ± 0.12 | 3.46 ± 0.08 | |
| *LVID; s (mm)* | 2.31 ± 0.06 | 2.73 ± 0.12 | 2.17 ± 0.13 | |
| *LVPW; d (mm)* | 0.96 ± 0.06 | 1.04 ± 0.09 | 0.95 ± 0.06 | |
| *LVPW; s (mm)* | 1.28 ± 0.05 | 1.19 ± 0.07 | 1.11 ± 0.06 | |
| *LVEF: Left Ventricular Ejection Fraction; FS: Fraction Shortening;* | | | |
| *LVEDV: Left Ventricular End-Diastolic Volume;* | | | |
| *LVESV: Left Ventricular End-Systolic Volume;* | | | |
| *LVAW; d: Left Ventricular End-Diastolic Anterior Wall thickness;* | | | |
| *LVAW; s: Left Ventricular End-Systolic Anterior Wall thickness;* | | | |
| *LVID; d: Left Ventricular End-Diastolic Internal Dimension;* | | | |
| *LVID; s: Left Ventricular End-Systolic Internal Dimension;* | | | |
| *LVPW; d: Left Ventricular End-Diastolic Posterior Wall thickness;* | | | |
| *LVPW; s: Left Ventricular End-Systolic Posterior Wall thickness.* | | | |

**Supplementary Table 2. List of PCR primers**

| **Names** | **Sequences** |
| --- | --- |
| Dog *Ccdc120* genome #1-F' | 5'-AGTCATTACCGCTTTGC-3' |
| Dog *Ccdc120* genome #1-R' | 5'-TCACCTCAGCAGGGCA-3' |
| Dog *Ccdc120* genome #2-F' | 5'-AGGAGCTGGCTCTTGA-3' |
| Dog *Ccdc120* genome #2-R' | 5'-TGGCGGTGGGAGTAC-3' |
| Dog *Pkp2* genome *-F'* | 5'-GACATGGAGATGACTCTAG-3' |
| Dog *Pkp2* genome *-R'* | 5'-TACATGGCCACCATAACAGA-3' |
| Dog *DP I/II* genome -F' | 5'-GAGCGCGCGCCGACAT-3' |
| Dog *DP I/II* genome -R' | 5'-GGGGACAAAGGGGTGCC-3' |
| Mouse *Ccdc120* mutant-F' | 5'-GGTCCGAGTCAGTAGTCATTAGGC-3' |
| Mouse *Ccdc120* mutant-R' | 5'-TGGTATCTACAGTCTTCCACCCTCA-3' |
| Mouse *Ccdc120* genotyping-F' | 5'-CACTTACTACTGCCCTCCCC-3' |
| Mouse *Ccdc120* genotyping-R' | 5'-GCAGACACACTTTCCTGAGC-3' |

**Supplementary Table 3. List of antibodies**

| **Names** | **Source** | **Indentifier** | **Dilution for IF** | **Dilution for WB** |
| --- | --- | --- | --- | --- |
| Rabbit anti-CCDC120 | Home-made | N/A | 1:50 | 1:300 |
| Rabbit anti-Desmoplakin | Proteintech | Cat# 25318-1-AP | 1:200 | 1:500 |
| Rabbit anti-PKP2 | Atlas Antibodies | Cat# HPA014314 | N/A | 1:500 |
| Mouse anti-PKP2 | Progen | Cat# 651101 | 1:10 | N/A |
| Mouse anti-DSG1/2 | Progen | Cat# 612128-02 | 1:50 | N/A |
| Rabbit anti-β-catenin | Proteintech | Cat# 51067-2-AP | 1:500 | N/A |
| Mouse anti-Keratin 18 | Proteintech | Cat# 66187-I-Ig | N/A | 1:1000 |
| Rabbit anti-Keratin 19 | Proteintech | Cat# 10712-1-AP | 1:50 | 1:3000 |
| Mouse anti-CEP170 | Abcam | Cat# ab72505 | N/A | 1:500 |
| Rabbit anti-Thiophosphate ester | HUABIO | Cat# H681300058 | N/A | 1:500 |
| Mouse anti-Alpha Tubulin | Proteintech | Cat# 66031-1-Ig | N/A | 1:10000 |
| Mouse anti-GFP | Proteintech | Cat# 66002-1-Ig | N/A | 1:2000 |
| Mouse anti-Flag | Sigma-Aldrich | Cat# F1804 | 1:200 | 1:4000 |
| Mouse anti-GAPDH | Proteintech | Cat# 60004-1-Ig | N/A | 1:5000 |
| Goat anti-Mouse IgG (H+L) Secondary Antibody | Invitrogen | Cat# 31160 | N/A | 1:5000 |
| Goat anti-Rabbit IgG (H+L) Secondary Antibody | Invitrogen | Cat# 31210 | N/A | 1:5000 |
| Donkey anti-Rabbit IgG (H+L) Highly Cross-Adsorbed Secondary Antibody, Alexa Fluor 488 | Invitrogen | Cat# A21206 | 1:200 | N/A |
| Goat anti-Mouse IgG (H+L) Highly Cross-Adsorbed Secondary Antibody, Alexa Fluor 488 | Invitrogen | Cat# A11017 | 1:200 | N/A |
| Goat anti-Rabbit IgG (H+L) Cross-Adsorbed SecondaryAntibody, Alexa Fluor 546 | Invitrogen | Cat# A11035 | 1:200 | N/A |
| Goat anti-Mouse IgG (H+L) Cross-Adsorbed SecondaryAntibody, Alexa Fluor 546 | Invitrogen | Cat# A11018 | 1:200 | N/A |
